# Supplementary material
Source: publisher site journal article supplement (http://www.kjim.org/upload/media/kjim-2018-055-suppl2.pdf)
Supplement: Supplementary file 1 [file kjim-2018-055-suppl2.pdf]

**Supplementary Table 2. Penetration aspiration scale**

| Category                     | Score | Descriptions                                                                   |
|------------------------------|-------|--------------------------------------------------------------------------------|
| No penetration or aspiration | 1     | Contrast does not enter the airway                                             |
|                              | 2     | Contrast enters the airway, remains above vocal folds; no residue              |
| Penetration                  | 3     | Contrast remains above vocal folds; visible residue remains                    |
|                              | 4     | Contrast contacts vocal folds; no residue                                      |
|                              | 5     | Contrast contacts vocal folds; visible residue remains                         |
|                              | 6     | Contrast passes glottis; no subglottic residue visible                         |
| Aspiration                   | 7     | Contrast passes glottis; visible subglottic residue despite patient's response |
|                              | 8     | Contrast passes glottis ; visible subglottic residue ; absent patient response |
